# Supplementary material for: Manipulating the nickel shape and catalytic performance: from spheres to chains to urchins
Source: Royal Society of Chemistry journal article supplement (doi:10.1039/c5ce00575b), 2015-01-01
Supplement: c5ce00575b1.pdf [file c5ce00575b1.pdf]

Toward one-pot manipulating the nickel shape and catalytic performance:  
from sphere, chain to urchin

Lin Chen, Minling Fang, Chengzhan Liu, Xianchun Liu\* and Shuangxi Xing\*

Faculty of Chemistry, Northeast Normal University, 5268 Renmin Street, Changchun, P.R.  
China 130024

Tel: (+86) 85099657; E-mail: xingsx737@nenu.edu.cn; liuxc804@nenu.edu.cn

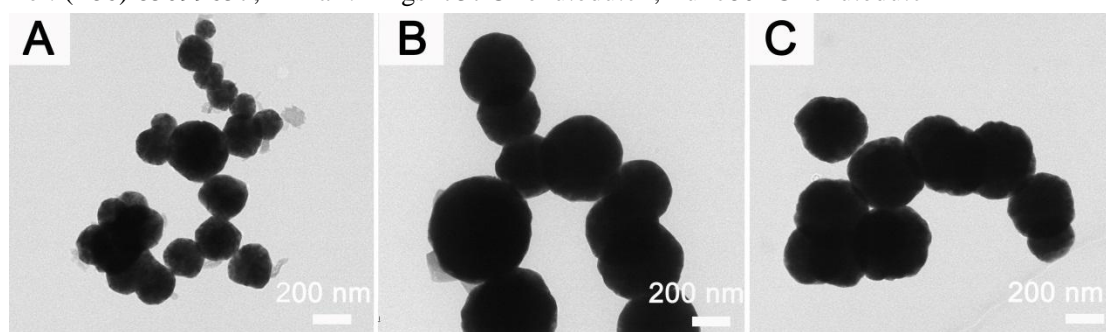

**Fig.S1** TEM images of the time-dependent experiments for the formation of nickel spheres: (A) 45 min (B) 90 min (C) 4 h.

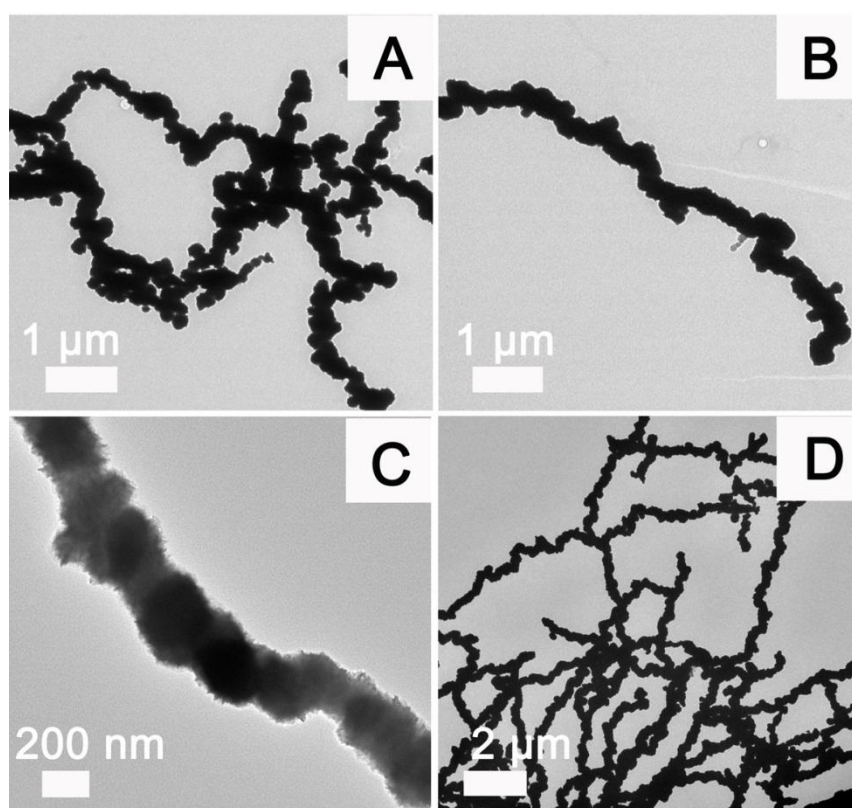

**Fig.S2** TEM images of the time-dependent experiments for the formation of nickel chains: (A) 15 min (B) 45 min (C) 150 min (D) 4 h.

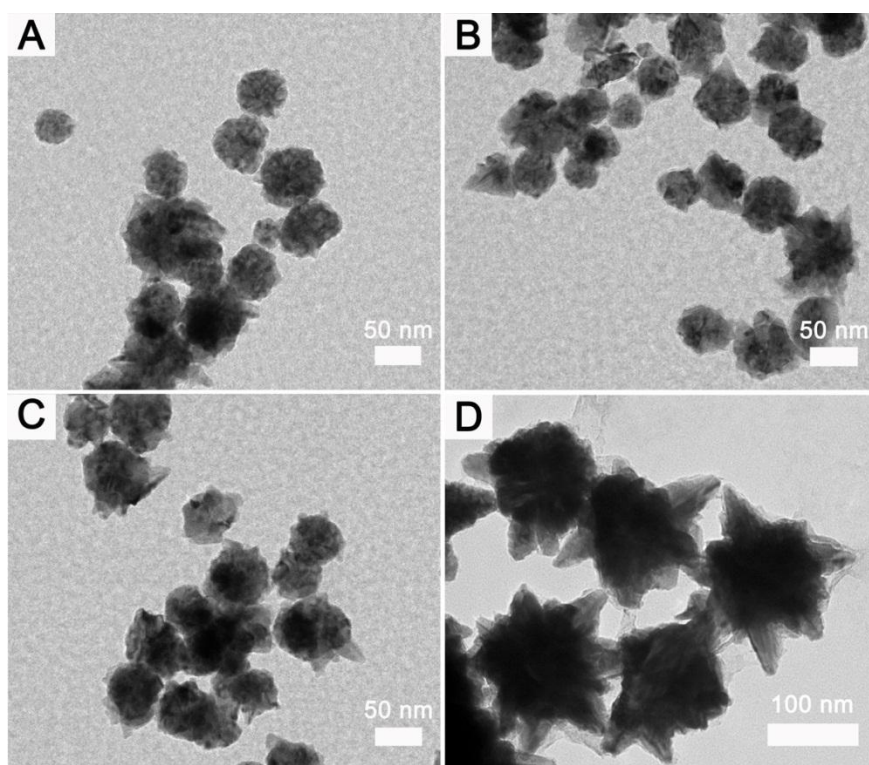

**Fig.S3** TEM images of the time-dependent experiments for the formation of nickel urchins: (A) 15 min (B) 90 min (C) 150 min (D) 4 h.

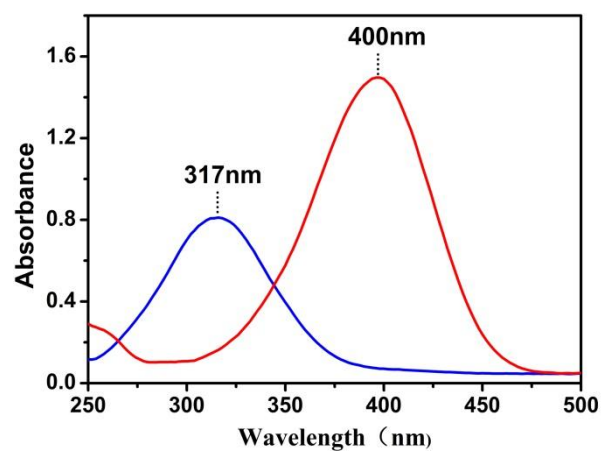

**Fig. S4** UV/Vis spectra of 4-NP before and after adding  $\text{NaBH}_4$  solution.

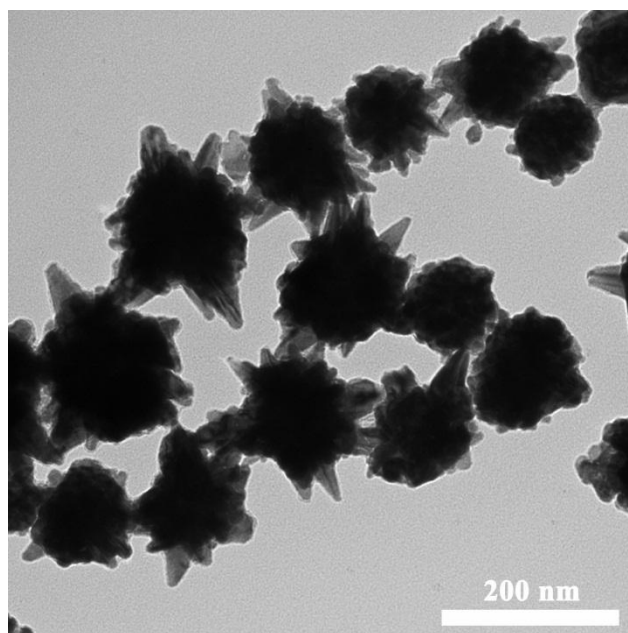

**Fig. S5** TEM image of nickel urchins after five cycles of catalytic reduction reactions
